# Supplementary material
Source: Springer Nature journal article supplement (https://www.springermedizin.de/resource/supplementary/12939_2006_84_MOESM12_ESM.pdf/9551502)

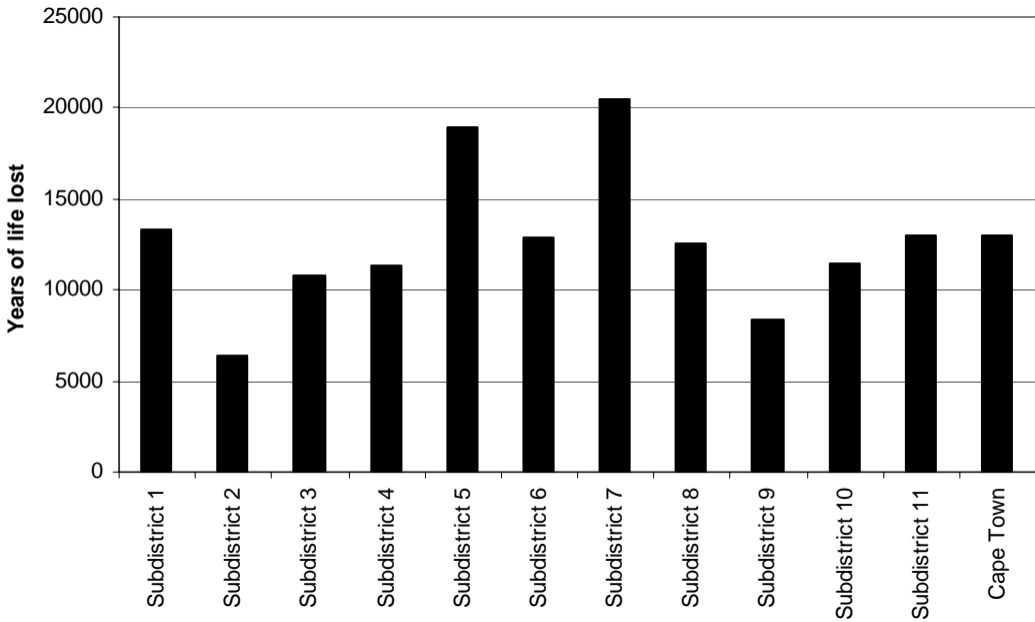

Supplement: MOESM12 [file 9551502]
